# Supplementary material for: Efficacy of Acupuncture for Treating Opioid Use Disorder in Adults: A Systematic Review and Meta-Analysis
Source: Evid Based Complement Alternat Med. 2018 Dec 2;2018:3724708. doi: 10.1155/2018/3724708 (PMC6304557; doi:10.1155/2018/3724708)
Supplement: Supplementary Materials — Appendices 1. Search strategy: special search strategies of ten online databases, namely, PubMed, Cochrane Central Register of Controlled Trials (CENTRAL), Embase, PsycINFO, Cumulative Index to Nursing and Allied Health Literature (CINAHL), Web of Science, ProQuest Dissertation and Theses, Allied and Complementary Medicine Database (AMED), Clinicaltrials.gov, and who.int/trialsearch. Appendices 2. PRISMA 2009 checklist: PRISMA 2009 is a guideline for reporting of systematic reviews, and we use the guideline to structure our manuscript. [file 3724708.f1.zip]

Archive with 3 entries (2 files):
- 3724708.f1/
- 3724708.f1/Appendices 1. Search strategy_ECAM_2591755.pdf
- 3724708.f1/Appendices 2. PRISMA 2009 checklist_ECAM_2591756.pdf
